# Supplementary material for: User Participation in Social Housing Work and Practices: A Scoping Review of Qualitative Studies from Denmark, Norway, and Sweden
Source: Research Square preprint supplement (doi:10.21203/rs.3.rs-7664136/v1), 2025-10-29
Supplement: Supplementary file 1 [file 91f919573c7622644da9867c.docx]

Table S1. Selection of qualifying studies

| **Database** | **Search date** | **Search words** | **Number of total hits** |
| --- | --- | --- | --- |
| Web of Science Database | 26.06.2025 | English search words | 1 434 |
| CINAHL (EBSCO)  Database | 27.06.2025 | English search words | 940 |
| PsychInfo OVID  Database | 30.06.2025 | English search words | 4986 |
| Scandinavian University Press  Digital platform | 02.07.2025 | Search in English, Norwegian, Danish and Swedish | 489 |
| ProQuest  Database | 05.07.2025 | English search words | 171 |

Table S2. Databases and search string

| **Database** | **Search string** | **Search date** | **Search language** |
| --- | --- | --- | --- |
| Web of Science | ("housing social work" OR "boligsosialt arbeid") AND ("user participation" OR "brukermedvirkning") AND ("qualitative study") AND ("social work") AND (Norway OR Sweden OR Denmark) | 26.06.2025 | English search words |
| CINAHL (EBSCOhost) | TX ("housing social work" OR "boligsosialt arbeid") AND TX ("user participation" OR "brukermedvirkning") AND TX ("qualitative study") AND TX ("social work") AND TX (Norway OR Sweden OR Denmark) | 27.06.2025 | English search words |
| PsycINFO (OVID) | (housing social work OR boligsosialt arbeid).tw. AND (user participation OR brukermedvirkning).tw. AND (qualitative study).tw. AND (social work).tw. AND (Norway OR Sweden OR Denmark.tw. | 30.06.2025 | English search words |
| Scandinavian University Press | "boligsosialt arbeid" AND "brukermedvirkning" AND "kvalitativ" | 02.07.2025 | Search in English, Norwegian, Danish and Swedish |
| ProQuest | ("housing social work" OR "boligsosialt arbeid") AND ("user participation" OR "brukermedvirkning") AND ("qualitative study") AND ("social work") AND (Norway OR Sweden OR Denmark) | 05.07.2025 | English search words |

Table S3. Search words

| **Theme** | **English** | **Danish** | **Norwegian** | **Swedish** |
| --- | --- | --- | --- | --- |
| Social housing work and user participation | housing-related social work, user participation | boligsocialt arbejde, brugerinddragelse | boligsosialt arbeid, brukermedvirkning | bostadssocialt arbete, brukarmedverkan |
| Social housing work and services | housing-related social work, services | boligsosialt arbeid, tjenester | boligsosialt arbeid, tjenester | boligsosialt arbeid, tjänster |
| Social housing work and practice | housing-related social work, practice | boligsocialt arbejde, praksis | boligsosialt arbeid, praksis | bostadssocialt arbete, praktik |
| Social housing work and user involvement | housing-related social work, user involvement | boligsocialt arbejde, brugerinddragelse | boligsosialt arbeid, brukerinvolvering | bostadssocialt arbete, brukarinvolvering |
| Social housing work and public services | housing-related social work, public services | boligsocialt arbejde, offentlige tjenester | boligsosialt arbeid, offentlige tjenester | bostadssocialt arbete, offentliga tjänster |
| Social housing work and qualitative study | housing-related social work, qualitative study | boligsocialt arbejde, kvalitativ undersøgelse | boligsosialt arbeid, kvalitativ studie | bostadssocialt arbete, kvalitativ studie |
| Social housing work and comparative studies | housing-related social work, comparative studies | boligsocialt arbejde, komparative studier | boligsosialt arbeid, komparative studier | bostadssocialt arbete, jämförande studier |
| Social housing work and social work | housing-related social work, social work | boligsocialt arbejde, socialt arbejde | boligsosialt arbeid, sosialt arbeid | bostadssocialt arbete, socialt arbete |
